# Supplementary material
Source: MDPI journal article supplement (https://www.mdpi.com/2673-5601/1/3/13)
Supplement: s1 [file s1]

## Supplementary Materials

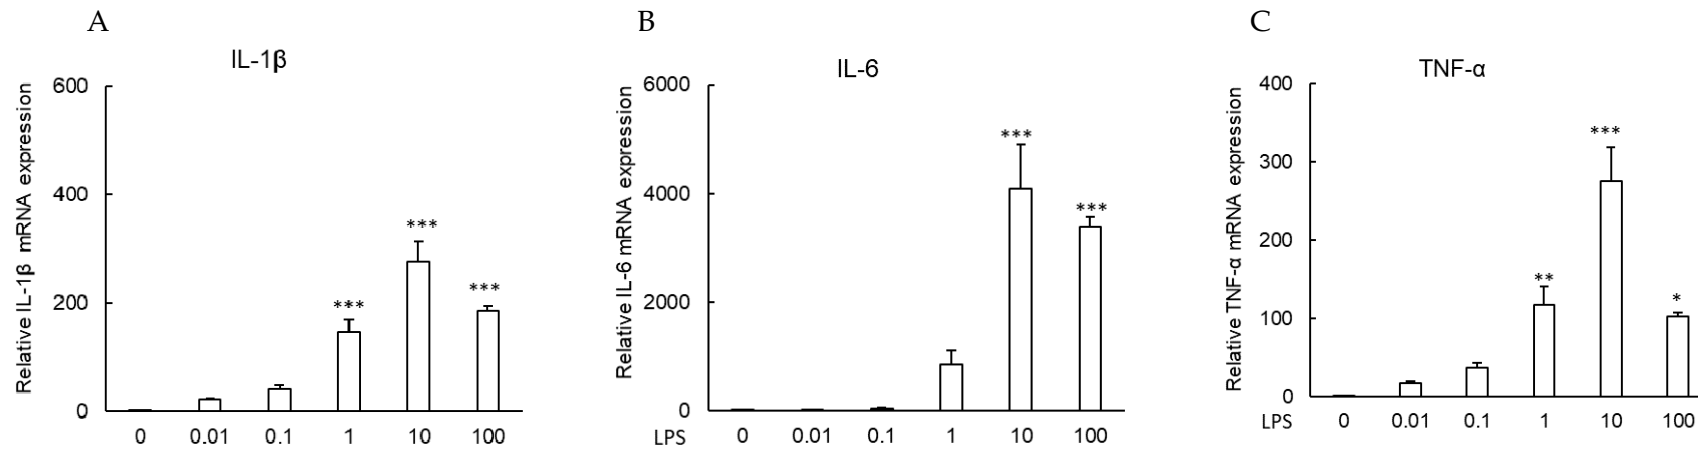

**Figure S1.** Effects of LPS treatment on astrocytic production of proinflammatory cytokines. (a-c) Astrocytes ( $n=4$ ) were treated with LPS (0-100 ng/ml) for 3 hours. Control values in (a-c) were obtained in the absence of LPS. The results are presented as means  $\pm$  SEMs. Data were analyzed by one-way ANOVA with Tukey's *post-hoc* test and  $*p < 0.05$  versus control cells.
